# Supplementary material
Source: PubMed Central journal article supplement (PMC365701)
Supplement: pnas_101_9_2806__1.pdf [file pnas_101_9_2806__1.pdf]

**Data Set 1. Sequence encompassing the region from primer TACFARUP to primer ORIREV408**

```
1 cagttgatcg gcgcgagatt taatcgccgc gacaatttgc gacggcgcgt
51 gcagggccag actggagggtg gcaacgcca taagcaacga ctgtttgccc
101 gccagttggt gtgccacgcg gttgggaatg taattcagct cgcctatcgc
151 cgcttccact ttttcccgcg ttttcgcaga aacgtggctg gcctggttca
201 ccacgcggga aacggtctga taagagacac cggcatactc tgcgacatcg
251 tataacgtta ctggtttcac attcaccacc ctgaattgac tctcttccgg
301 gcgctatcat gccataccgc gaaaggtttt gcaccattcg gctagcgcgt
351 accctgctga ttggttcgct gaccatttcc ggggtgcgga acggcgttac
401 cagaaactca gaaggttcgt ccaaccaaac cgactctgac ggaggtttac
451 gagagagatg atagggctctg cttcagtaag ccagatgcta cacaattagg
501 cttgtacata ttgtcgttag aacgcggcta caattaatac ataaccttat
551 gtatcataca catacgattt aggtgacact atagaataca agcttactcc
601 ccatccccct gttgacaatt aatcatggct cgtataatgt gtggaattgt
651 gagcggataa caatttcaca caggaaacag gatctacatc ggccnnbnnb
701 nnnnnnnnnn nnnnnnnnnn bnnnnnnnnn nnnnnnnnnn nnnnnnnnnn
751 gggaggagga tcagcggccc caactgatct tcaccaaacg tattaccgcc
801 aggtaaagaa cccgaatccg gtgttctact cccgtgaagg tgccggaacg
851 ccgaagtacc gcgaaaaacc gatggaaaag gcggtgggcc tcacctcccg
901 ttttgatctc gccattcatg tggcgcgatg ccgttcccgt ggtctgcgct
951 ggcgcattcc accggtgctg cgtcgacggg ctattgatgc gctgctgcag
1001 gggctgtggt tccactatga cccgctggcc aaccgctcc agtgttccat
1051 caccacactg gccattgagt gcggactggc gacagagtcc ggtgcaggaa
1101 aactctccat caccctgccc acccgggccc tgacgttccct gtcagagctg
1151 ggactgatta cctaccagac ggaatatgac ccgcttatcg ggtgctacat
1201 tccgaccgac atcacgttca cactggctct gtttgctgcc cttgatgtgt
1251 ctgaggatgc agtggcagct gcgcgccgca gtcgtgttga atgggaaaac
1301 aaacagcgca aaaagcaggg gctggatacc ctgggtatgg atgagctgat
1351 agcgaaagcc tggcgttttg tgcgtgagcg tttccgcagt taccagacag
1401 agcttcagtc ccgtggaata aaacgtgccc gtgcgcgctc tgatgcgaac
1451 agagaacgtc aggatatcgt caccctagtg aaacggcagc tgacgcgtga
1501 aatctcggaa ggacgcttca ctgctaattg tgaggcggta aaacgcgaag
1551 tggagcgtcg tgtgaaggag cgcattgatt tgtcacgtaa ccgcaattac
1601 agccggctgg ccacagcttc tccctgaaaag tgatctcctc agaataatcc
1651 ggctgcgccc ggaggcatcc gcacgcctga agcccggcgg tgcaaaaaaa
1701 aacagcgtcg catgcaaaaa acaatctcat catccacctt ctggagcatc
1751 cgattcccc tgtttttaac acaaaaatac cctcagcgac ggggaatttt
1801 gcttatccac atttaactgc aagggacttc cccataaggt tacaaccggt
1851 catgtcataa agcgcagcc gccagcttta cagggtgcaa tgtatctttt
1901 aaacacctgt ttatatctcc tttaaactac ttaattacat tcatttaaaa
1951 agaaaacctt ttcactgcct gtcctgtgga cagacagata tgcacctccc
2001 accgcaagcg gcgggccccg accggagcca ctttagttac aacacacaaa
2051 aacaacctcc agaaaaacc cggccagcg cagaaccgaa accacaaagc
2101 ccctccctca taactgaaaa gcggccccgc cccggcccaa agggccggaa
2151 cagagtcgct ttttaattatg aatgttgtaa ctacatcttc atcgctgtca
2201 gtcttctcgc tggaaagttct cagtacacgc tcgtaagcgg ccctcacggc
2251 ccgtaacgc ggagacacgc cccgacttcc ggtaaaccct cgtcgggacc
2301 actccgaccg cgcacagaag ctctctcatg gctgaaagcg ggtatggtct
2351 ggcagggctg gggatgggta aggtgaaatc tatcaatcag taccggctta
2401 cg
```
